# Supplementary material for: Acetylation of conserved DVL-1 lysines regulates its nuclear translocation and binding to gene promoters in triple-negative breast cancer
Source: PubMed Central journal article supplement (PMC6838061; doi:10.1038/s41598-019-52723-3), 2019-11-07
Supplement: 41598_2019_52723_MOESM1_ESM.pdf [file 41598_2019_52723_MOESM1_ESM.pdf]

## **Acetylation of conserved DVL-1 lysines regulates its nuclear translocation and binding to gene promoters in triple-negative breast cancer**

Monica Sharma, Deborah Molehin, Isabel Castro Piedras, Edgar Martinez, and Kevin Pruitt\*

Department of Immunology and Molecular Microbiology, Texas Tech University Health Sciences Center, Lubbock, TX, USA

\*Address correspondence to: Kevin Pruitt, Ph.D., Department of Immunology & Molecular Microbiology, Texas Tech University Health Sciences Center, 3601 4th Street, Lubbock, Texas 79430-6591, (ph) 806-743-2523; (fax) 806-743-2334, Email: [kevin.pruitt@ttuhsc.edu](mailto:kevin.pruitt@ttuhsc.edu)

A.

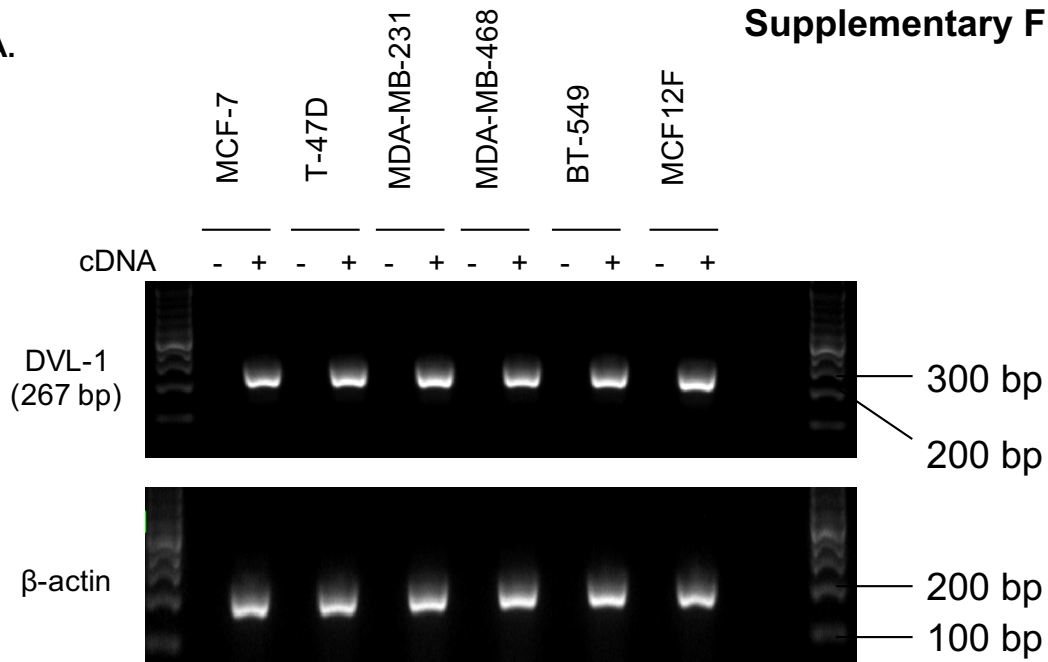

B.

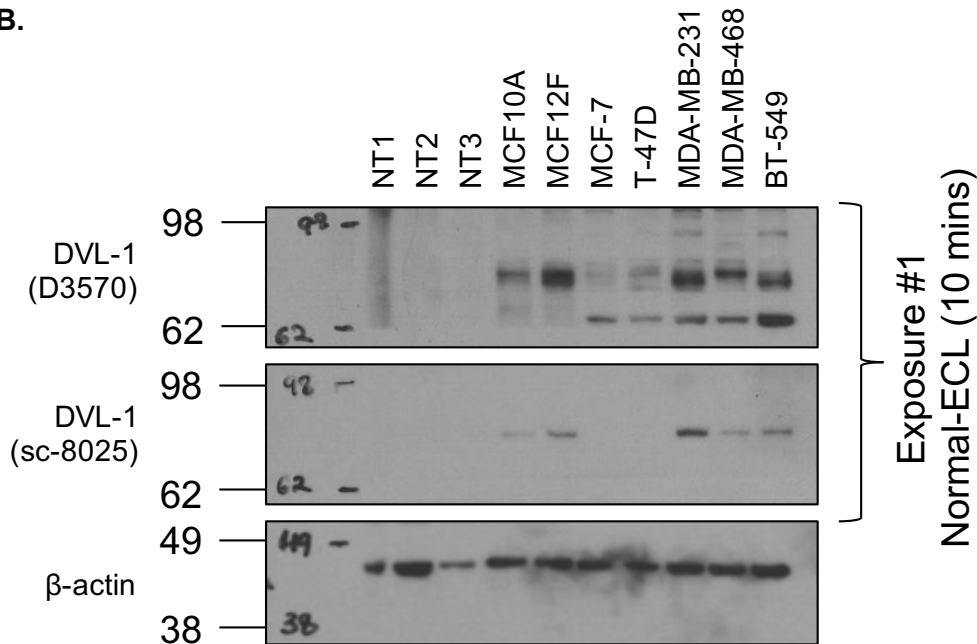

**Supplementary Figure S1. Dishevelled expression in breast cancer cell lines.** (A) Total mRNA was isolated from different breast cancer cell lines (MCF-7, T-47D, MDA-MB-231, BT-549 and MDA-MB-468), and a human non-cancer breast epithelial cell line (MCF12F). End-point PCR (RT-PCR) analysis of endogenous DVL-1 gene was performed using intron-spanning primers. For each amplification, either the cDNA was excluded (-) or included (+) in the reverse-transcription reaction and  $\beta$ -actin was included as a control. (B) This figure represents full-length blots for Fig. 1B with exposure times using Normal-ECL. The protein expression patterns of endogenous DVL-1 were analysed by Western blotting in breast normal whole tissue lysates (NT1, NT2, and NT3), a human non-cancer breast epithelial cell line (MCF10A and MCF12F), and different breast cancer cell lines (as described above). The membranes were probed with two different DVL-1 specific antibodies (D3570; Sigma and sc-8025; Santa Cruz Biotechnology, Inc), and  $\beta$ -actin was included as a control.

A.

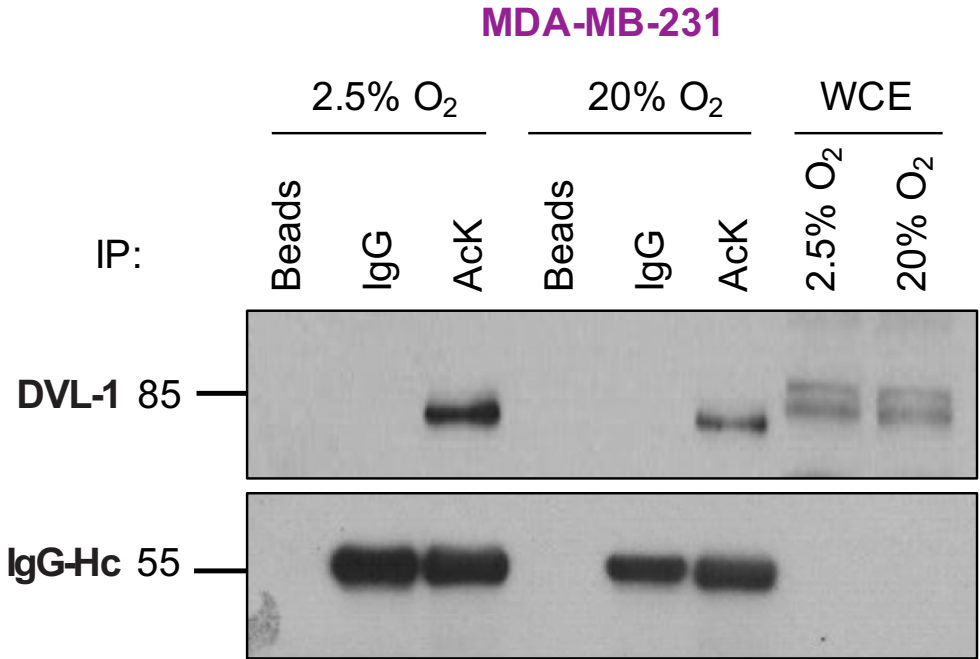

B.

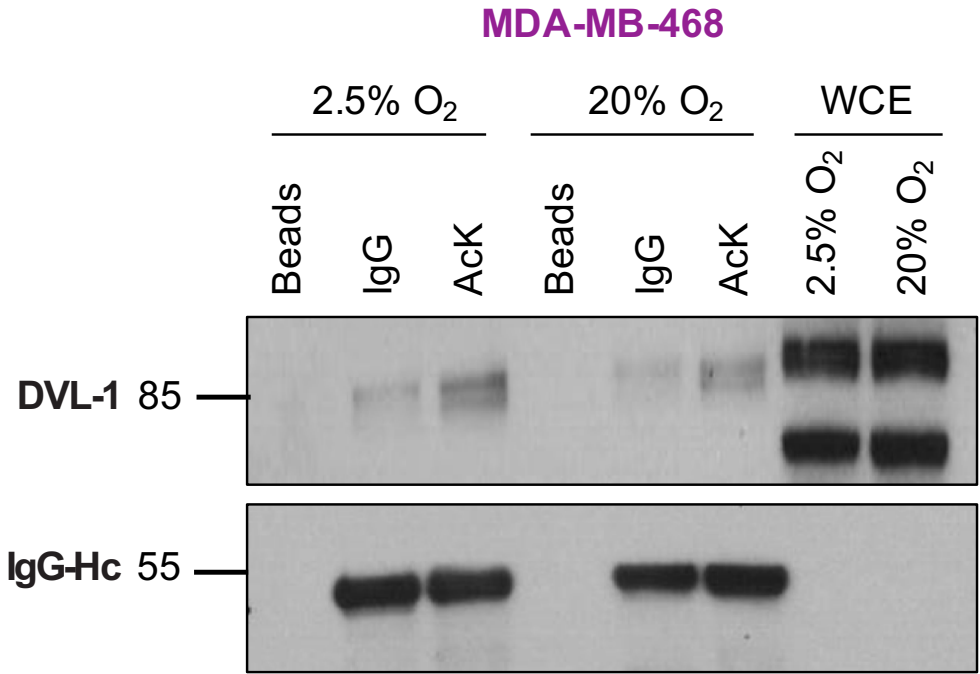

**Supplementary Figure S2. DVL-1 proteins are acetylated in triple negative breast cancer cells at lower oxygen tension.** MDA-MB-231 and MDA-MB-468 were cultured in two conditions, lower (2.5%) and atmospheric (20%) oxygen conditions. Equal amount of protein (2µg) was loaded for each immunoprecipitation set up using acetyl-lysine (Ac-K) antibody as per protocol. Acetylation of DVL-1 was detected by western blotting in (A) MDA-MB-231 (B) MDA-MB-468 along with positive control, whole cell extract (WCE) using DVL-1 specific antibody. Species-matched IgG and beads only were used as a negative control. IgG heavy chain (IgG Hc) was blotted for as a control for equal antibody loading for immunoprecipitation.

## Supplementary Figure S3

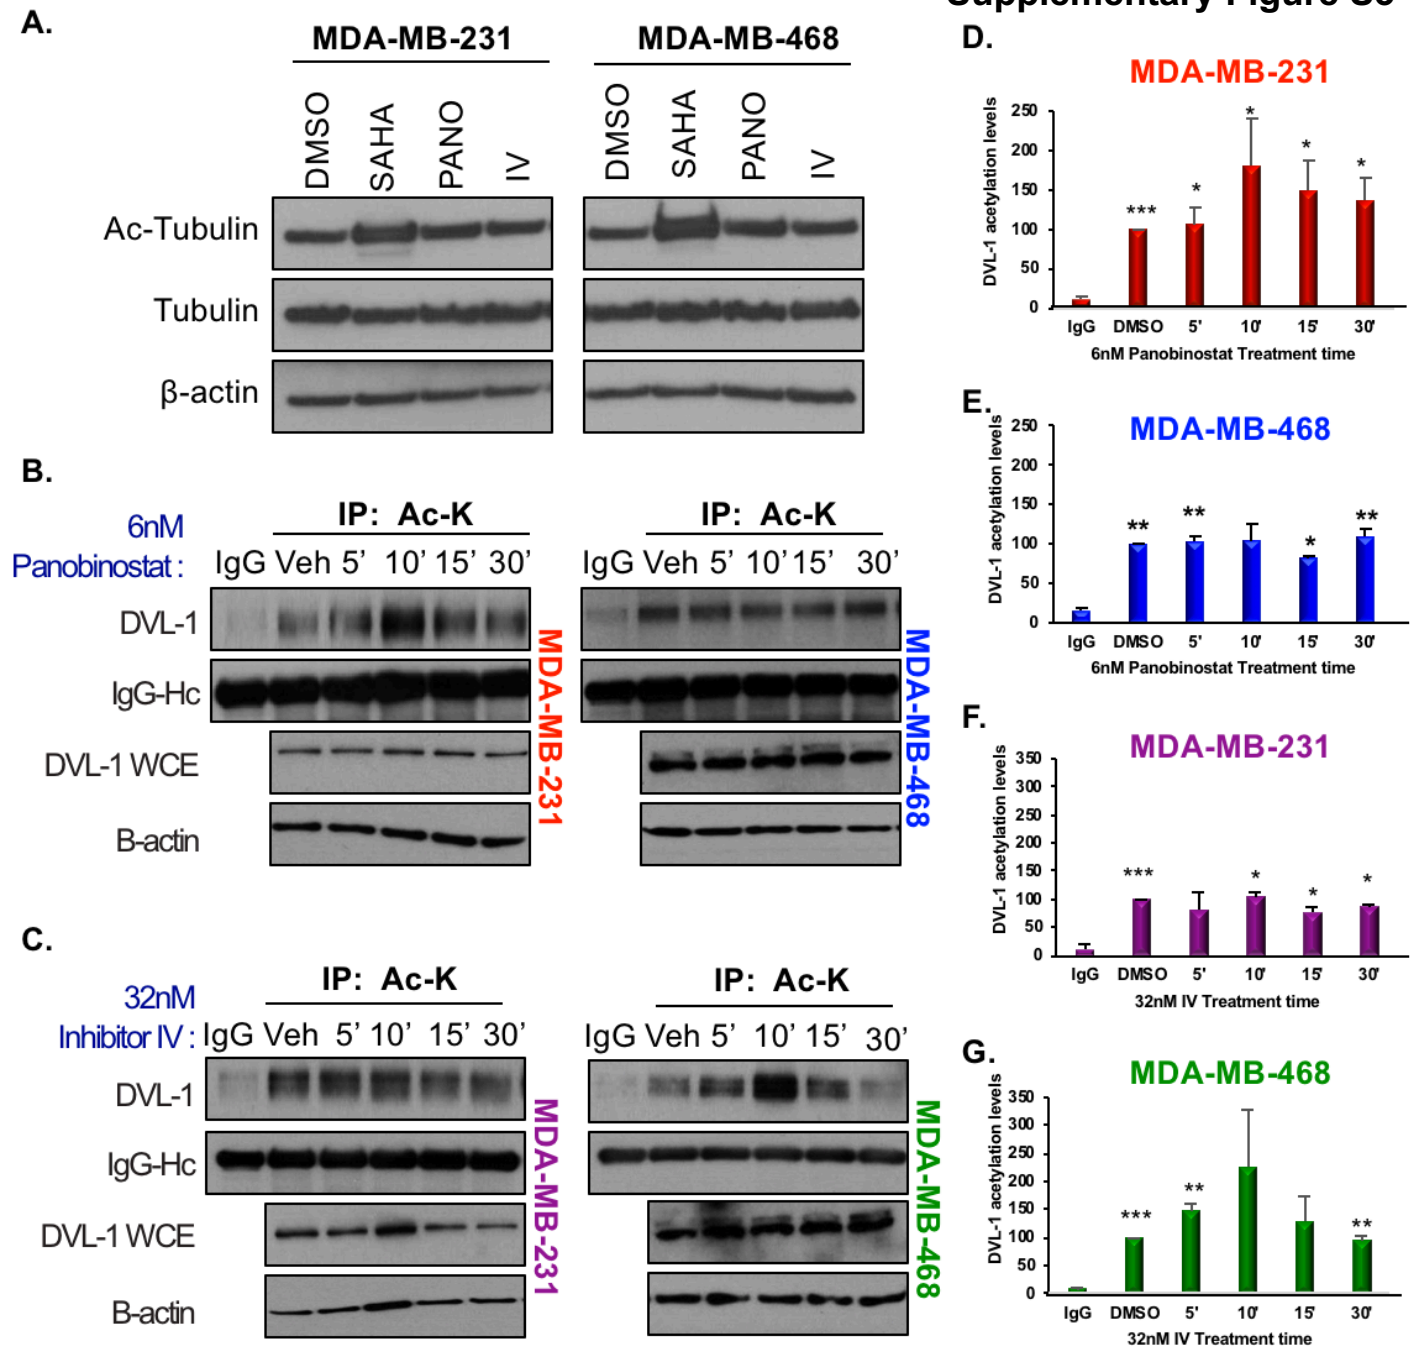

**Supplementary Figure S3. Time Kinetics of DVL-1 acetylation upon deacetylase inhibition.** (A) MDA-MB-231 and MDA-MB-468 were treated with deacetylase inhibitors: DMSO as vehicle control, SAHA, Panobinostat, and Inhibitor-IV. Protein lysates were subjected to western blot and probed for tubulin vs Ac-Tubulin as the internal controls for any alteration of the inhibition. 231 and 468 cells were treated with (B) 6nM Panobinostat and (C) 32nM Inhibitor-IV for a short time period range from 5 mins to 30 mins. Equal amount of protein were loaded for each immunoprecipitation set up using acetyl-lysine (Ac-K) antibody as per protocol. Acetylation of DVL-1 was detected by western blotting along with positive control, whole cell extract (WCE) using DVL-1 specific antibody. Species-matched IgG and beads only were used as a negative control. IgG heavy chain (IgG Hc) was blotted for as a control for equal antibody loading for immunoprecipitation. The graph represents relative levels of DVL-1 acetylation over short treatment time in (D) 231 cells treated with 6nM Panobinostat, (E) 468 cells treated with 6nM Panobinostat, (F) 231 cells treated with 32nM Inhibitor-IV, and (G) 468 cells treated with 32nM Inhibitor-IV. All results are expressed as mean  $\pm$  SEM and considered significant at \*  $p < 0.05$ , \*\*  $p < 0.01$  and \*\*\*  $p < 0.001$ .

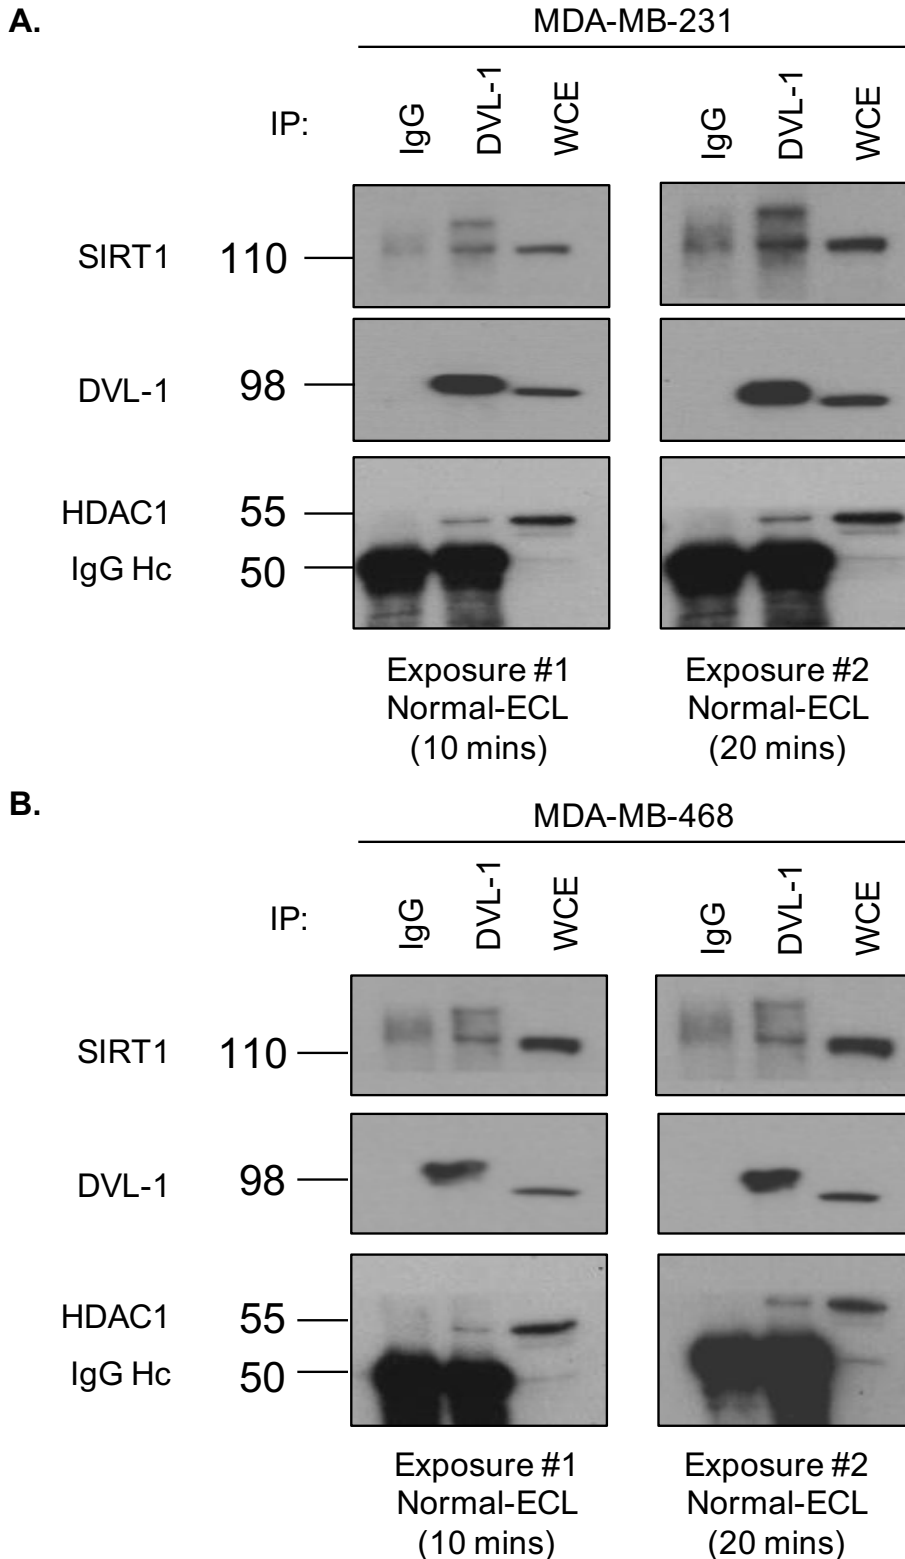

**Supplementary Figure S4. Interaction between different class of deacetylases and DVL-1 proteins in multiple cell lines.** This figure represents blots for Fig. 3A and Fig. 3B with different exposure time in (A) MDA-MB-231 and (B) MDA-MB-468 cells using Normal-ECL. Untreated cells were used to extract whole cell lysate for immunoprecipitation of endogenous DVL-1 with specific antibody and species-matched IgG was used as a negative control. Western blotting was performed for SIRT1 and HDAC1 from immunoprecipitated samples along with whole cell extracts (WCE).

A.

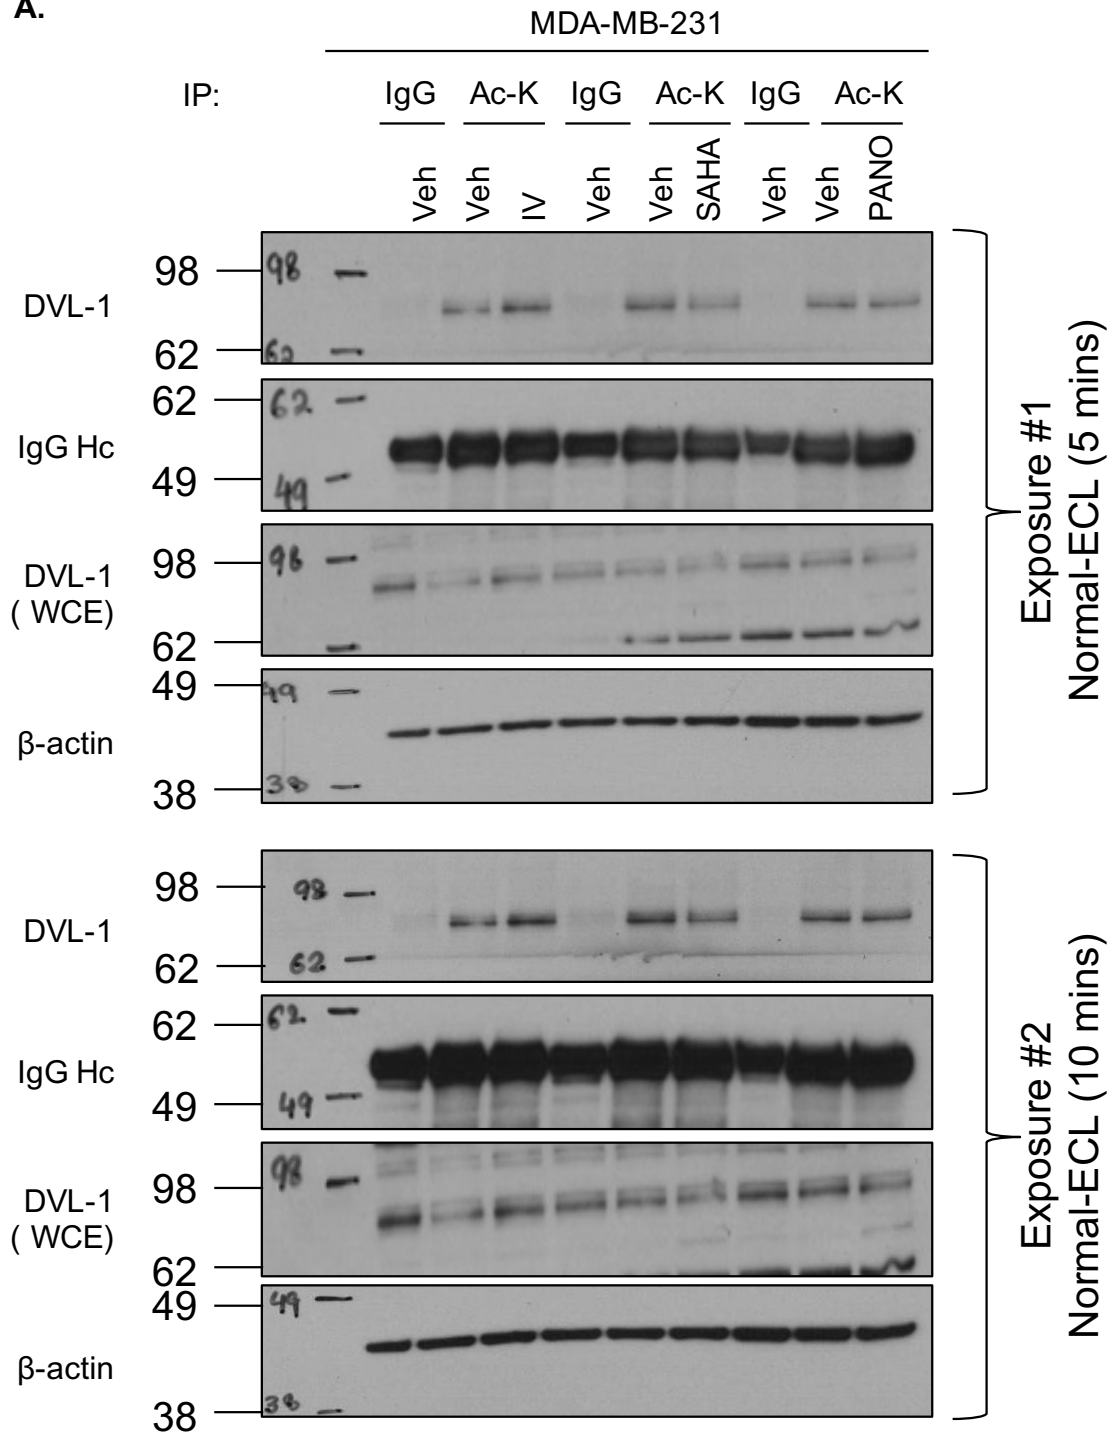

**Supplementary Figure S5. Deacetylase inhibition alters DVL-1 acetylation levels in MDA-MB-231 cell lines.** This figure represents full-length blots for Fig. 3C with different exposure times using Normal-ECL in MDA-MB-231 cells. Cells were treated with either DMSO (vehicle control; Veh) or 32nM inhibitor-IV (IV), or 1 $\mu$ M SAHA, or 6nM Panobinostat (PANO) for 10 minutes. Equal amount of protein (2 $\mu$ g) was loaded for each immunoprecipitation set up using acetyl-lysine (Ac-K) antibody as per protocol. Acetylation of DVL-1 was detected by western blotting along with positive control, whole cell extract (WCE) using DVL-1 specific antibody. Species-matched IgG was used as a negative control. IgG heavy chain (IgG Hc) was blotted for as a control for equal antibody loading for immunoprecipitation.  $\beta$ -actin was included as a loading control for WCE.

A.

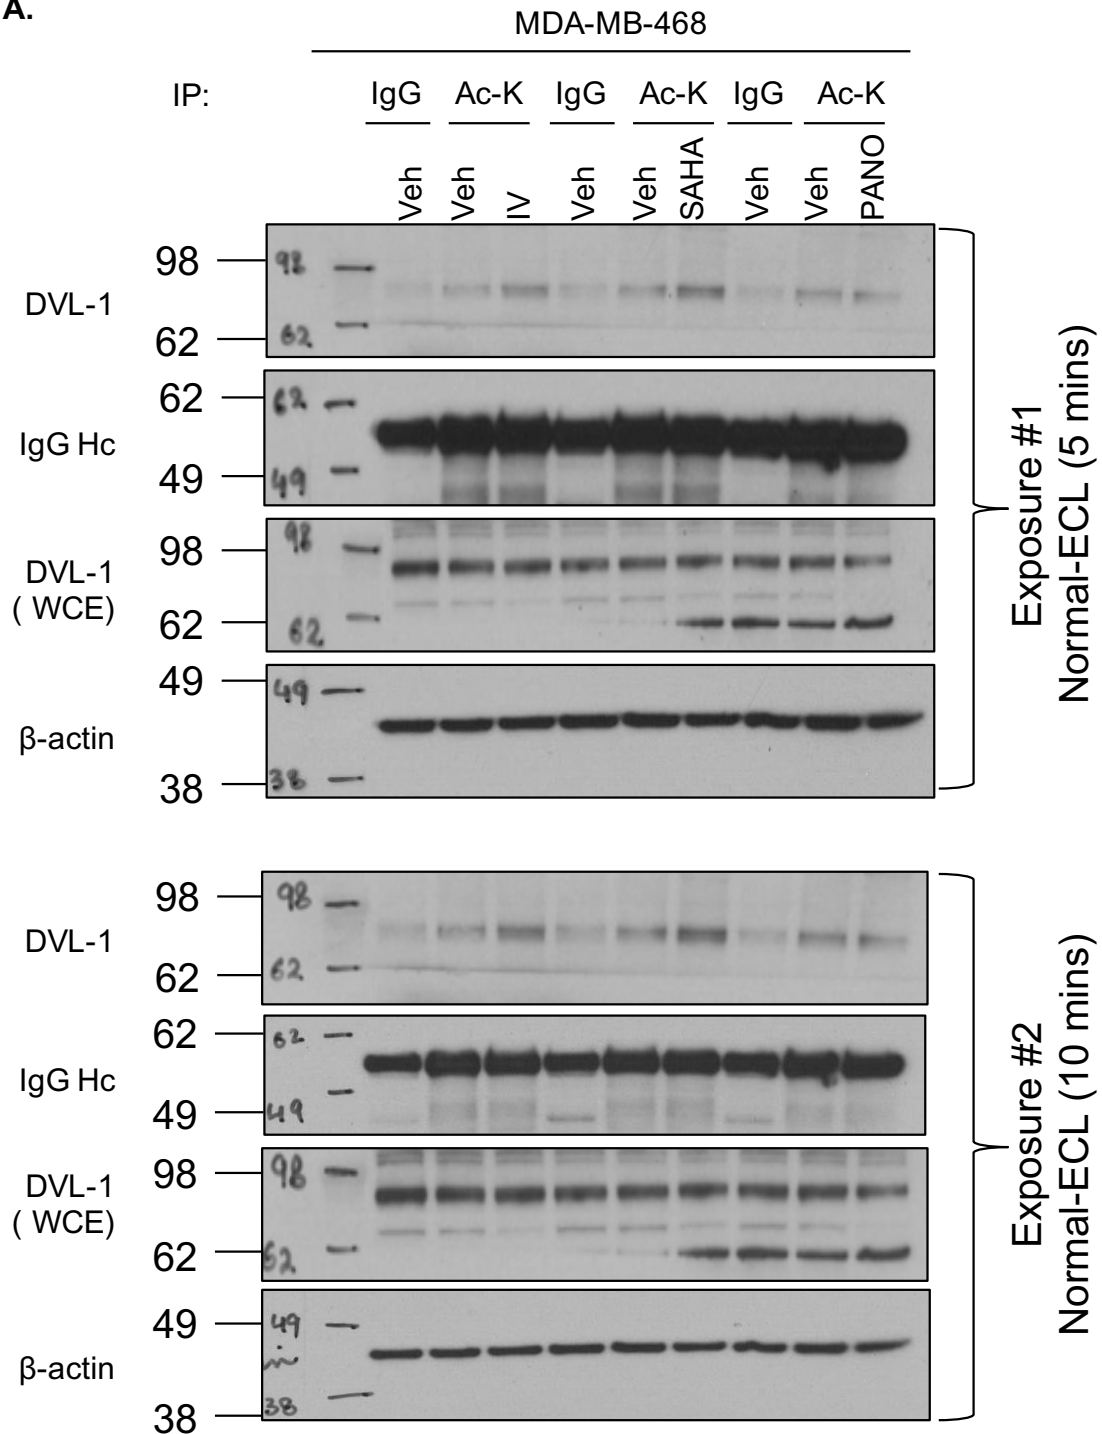

**Supplementary Figure S6. Deacetylase inhibition alters DVL-1 acetylation levels in MDA-MB-468 cell lines.** This figure represents full-length blots for Fig. 3D with different exposure times using Normal-ECL in MDA-MB-468 cells. Cells were treated with either DMSO (vehicle control; Veh) or 32nM inhibitor-IV (IV), or 1 $\mu$ M SAHA, or 6nM Panobinostat (PANO) for 10 minutes. Equal amount of protein (2 $\mu$ g) was loaded for each immunoprecipitation set up using acetyl-lysine (Ac-K) antibody as per protocol. Acetylation of DVL-1 was detected by western blotting along with positive control, whole cell extract (WCE) using DVL-1 specific antibody. Species-matched IgG was used as a negative control. IgG heavy chain (IgG Hc) was blotted for as a control for equal antibody loading for immunoprecipitation.  $\beta$ -actin was included as a loading control for WCE.

A.

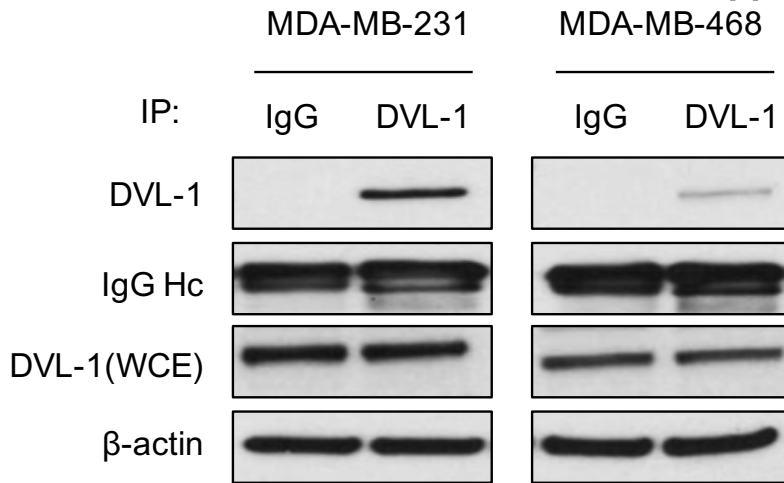

B.

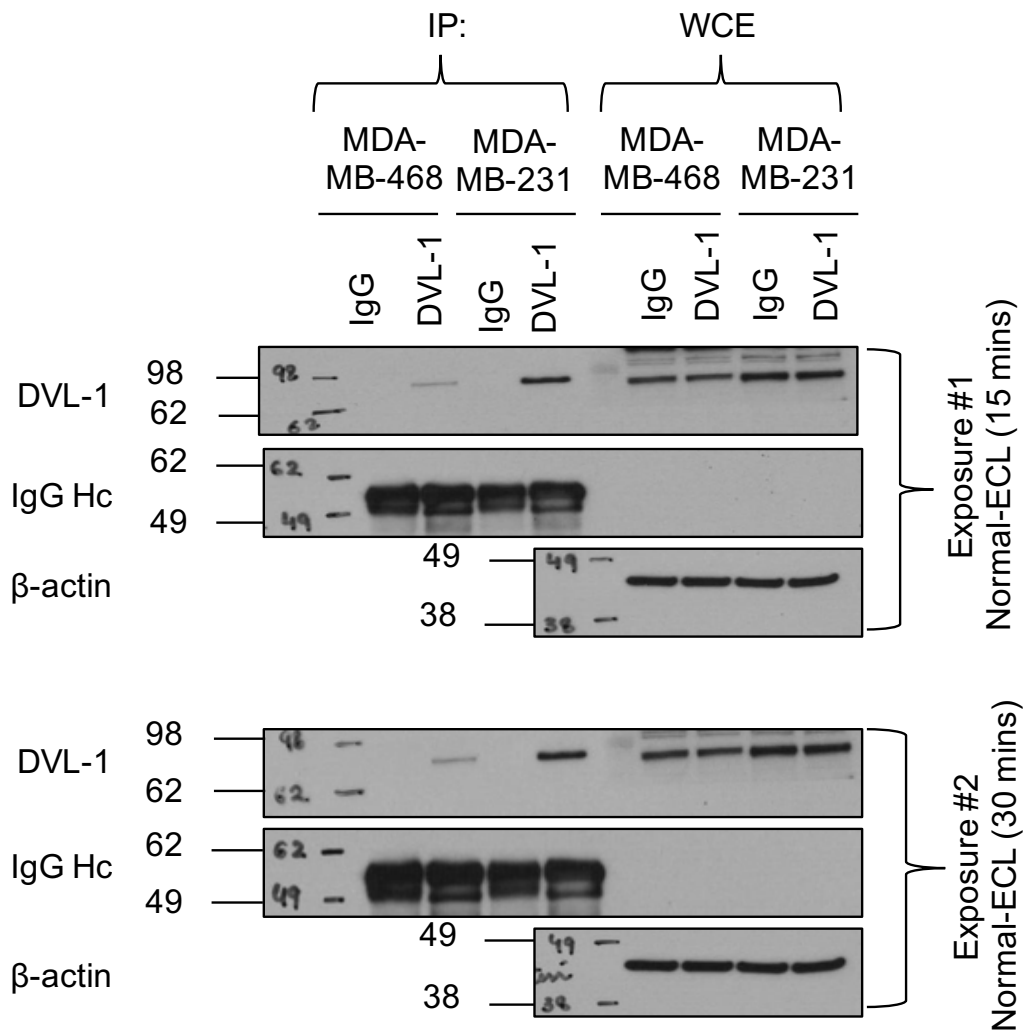

**Supplementary Figure S7. Immunoprecipitation of DVL-1 proteins.** (A) To determine the specificity of DVL-1 antibody, immunoprecipitation was performed for DVL-1 (D3570; Sigma) or species-matched IgG control. Western blot was performed for DVL-1 from immunoprecipitated samples along with whole cell extracts (WCE). IgG heavy chain (IgG Hc) was blotted for as a control for equal antibody loading for immunoprecipitation.  $\beta$ -actin was included as a loading control for WCE. (B) This figure represents full-length blots for Fig. S7(A) with different exposure times using Normal-ECL.



A.

| Acetylated lysines on endogenous DVL-1 in TNBC cells |                        |
|------------------------------------------------------|------------------------|
| K-Ac                                                 | Representative peptide |
| K5                                                   | AETKIIYHMDEEETPYLVK    |
| K34                                                  | VTLADFK                |
| K60                                                  | SMDQDFGVVK             |
| K69                                                  | EEIFDDNAK              |
| K285                                                 | GDGGIYIGSIMK           |
| K476                                                 | KYASSLLK               |

B.

| Acetylated lysines on endogenous DVL-1 in MCF10A cells |                        |
|--------------------------------------------------------|------------------------|
| K-Ac                                                   | Representative peptide |
| K34                                                    | VTLADFK                |
| K69                                                    | EEIFDDNAK              |
| K438                                                   | DRMWLK                 |
| K476                                                   | YASSLLKHGFLR           |

**Supplementary Figure S8. Putative lysine residues acetylated on endogenous DVL-1.** The table indicates putative lysine residues on endogenous DVL-1 that were found to be acetylated (A) under basal and KDI-induced conditions in MDA-MB-231 and MDA-MB-468 cells, and (B) in non-cancer mammary epithelial MCF10A cells, along with their representative peptide as detected by liquid chromatography mass spectrometry (LC-MS/MS) analyses.

A.

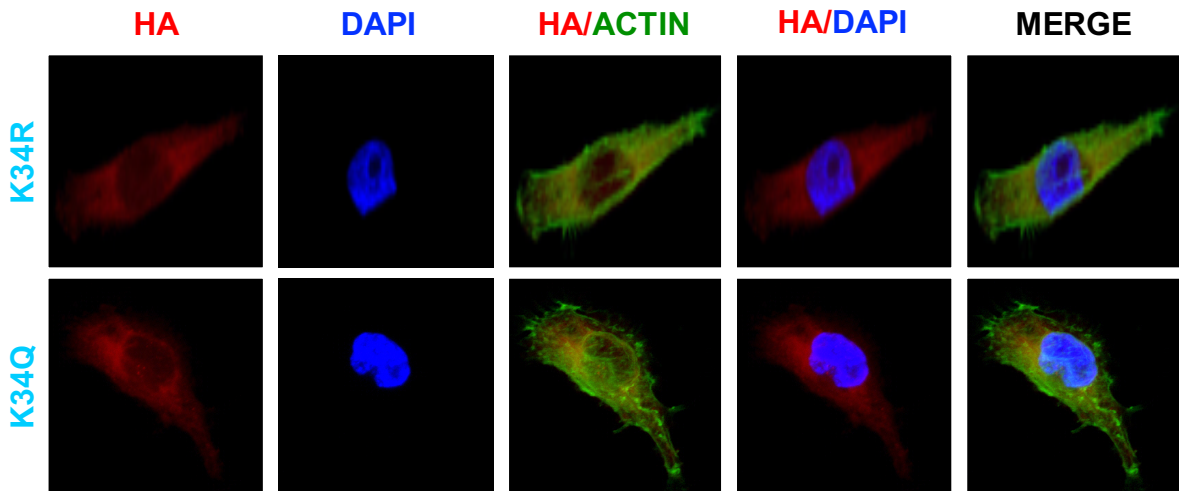

B.

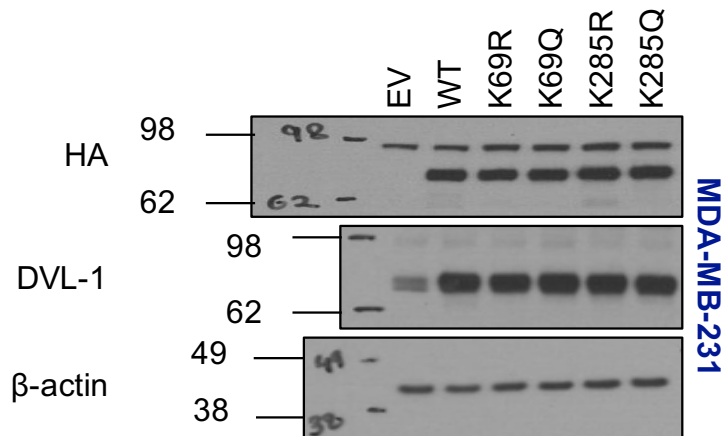

C.

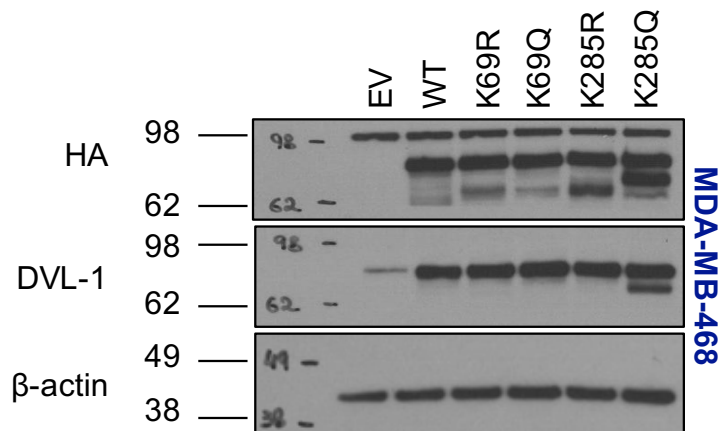

**Supplementary Figure S9. Acetylation on K34 residue does not influence DVL-1 subcellular localization in MDA-MB-231 cells.** (A) Immunofluorescence staining of K34R mutant (N-HA-K34R), K34Q mutant (N-HA-K34Q) proteins in stable expressing MDA-MB-231 cells. Merge of N-HA-DVL-1 (red) and nuclear staining (blue) proteins is shown as HA/DAPI for each of the mutant. Merge of actin (green) and N-HA-DVL-1 (red) proteins is shown as HA/Actin for each of the mutant. Full length images of Fig. 6A and Fig. 7A representing stable expression of empty vector (EV), N-terminal HA-epitope tagged DVL-1 wild type (WT), HA-tagged deacetylation mutants (K to R), and HA-tagged acetylation mutants (K to Q) on two lysine residues, K69 and K285 in (B) MDA-MB-231 and (C) MDA-MB-468 cells.

A.

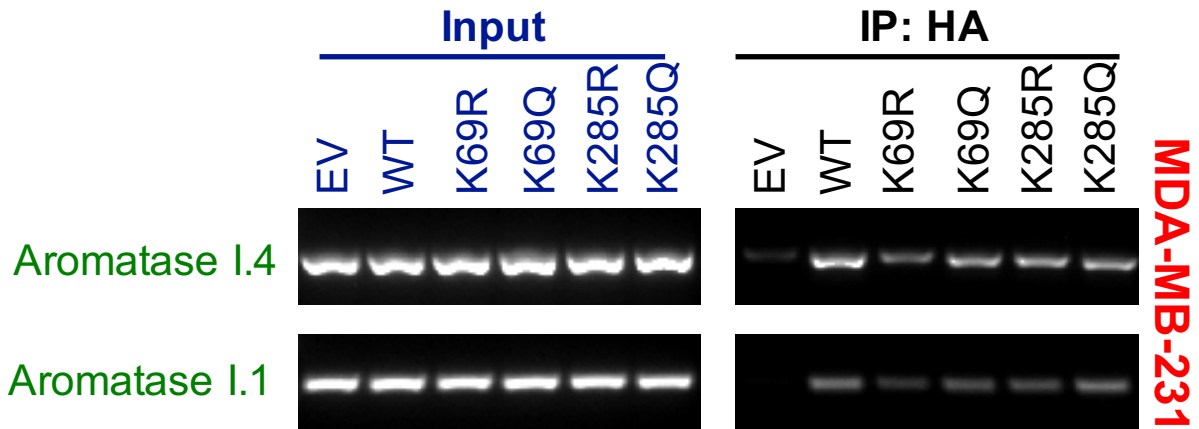

B.

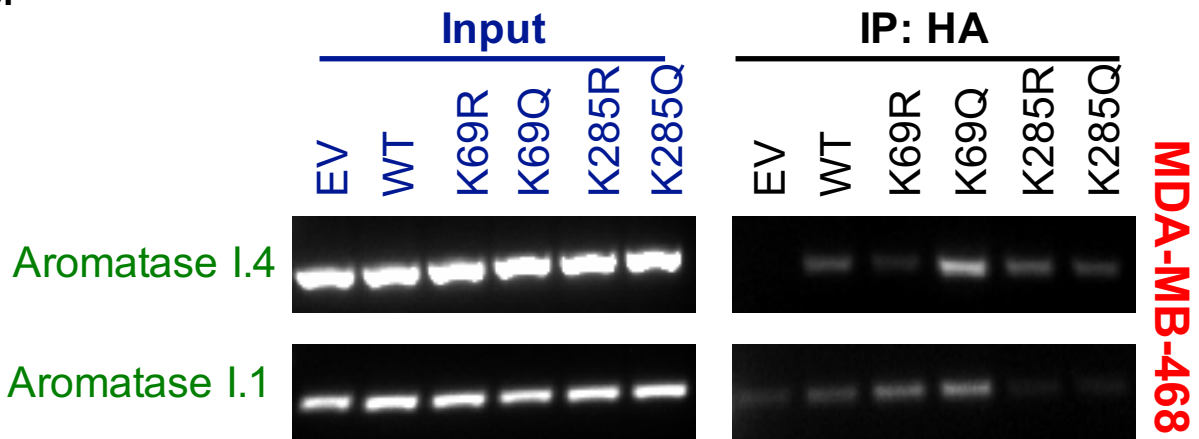

**Supplementary Figure S10. DVL-1 acetylation on K69 and K285 lysine residues influences its binding to *CYP19A1* (aromatase) promoters.** Occupancy of HA-tagged DVL-1 at tissue-specific promoters of *CYP19A1* gene (adipose I.4, and placental I.1 promoter) were analysed by end-point PCR. ChIP experiments for HA-tag were performed in (A) MDA-MB-231 and (B) MDA-MB-468 cells stably expressing EV (empty vector; negative control), HA-tagged wild-type DVL-1 (WT), HA-tagged deacetylation mutants (K69R and K285R), and HA-tagged acetylation mutants (K69Q and K285Q).
